# Supplementary material
Source: Springer Nature journal article supplement (https://www.springermedizin.de/resource/supplementary/13601_2011_5_MOESM5_ESM.pdf/9677268)

Nasal Obstruction

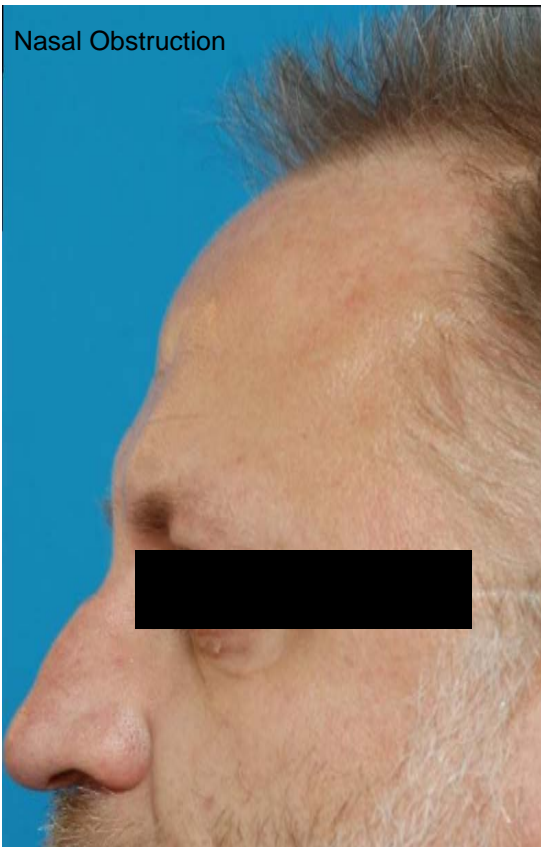

Good Nasal Flow

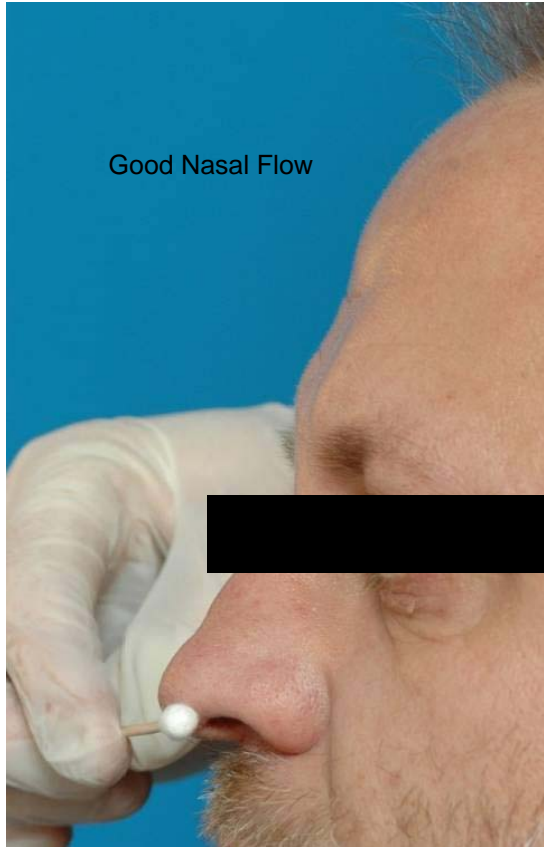

Supplement: MOESM5 [file 9677268]
